# Supplementary material
Source: HighWire-hosted journal article supplement (https://jmg.bmj.com/content/jmedgenet-2018-105267)
Supplement: inline-supplementary-material-1 [file inline-supplementary-material-1.docx]

**Supplemental Information**

**Supplementary Table 1.** Description of patient characteristics.

| **Feather** | **Number** |
| --- | --- |
| All cases | 40 |
| Age(years) |  |
| <60 | 18 |
| ≥ 60 | 22 |
| Gender |  |
| Male | 35 |
| Female | 5 |
| Tumor size (cm) |  |
| < 3 | 4 |
| 3-5 | 16 |
| > 5 | 20 |
| Differentiation grade |  |
| Well | 3 |
| Moderate | 19 |
| Poorly | 18 |
| Tumor number |  |
| Solitary | 34 |
| Multiple | 6 |
| Tumor capsular |  |
| Incomplete | 3 |
| Complete | 37 |
| TNM stage |  |
| I | 3 |
| II | 26 |
| III | 11 |
